# Supplementary material for: Diagnosis and treatment of children with rare hemhidrosis and pediatrician's care experience: a case report
Source: Research Square preprint supplement (doi:10.21203/rs.3.rs-8308429/v1), 2026-01-06
Supplement: Supplementary file 1 [file 64182e228a0940b8f6c432f2.docx]

| **CARE Item** | **Where it appears (Page & Paragraph)** |
| --- | --- |
| Title includes “case report” | Page 1, Para 1 |
| Key words | Page 1, Para 4 |
| Abstract | Page 1, Paras 1–3 |
| Introduction | Page 2,Paras 1 |
| Patient information | Page 2, Paras 2-Page3 Paras 1 |
| Clinical findings | Page 3, Para 1 |
| Diagnostic assessment | Page 3, Paras 2 |
| Therapeutic intervention | Page 3, Para 2 |
| Follow-up and outcomes | Page 3, Para 3 |
| Discussion | Page 5–7 |
| Conclusion | Page 7 |
| Informed consent | Page 7-8 |
| Funding / COI / Ethics | Page 8(Declarations) |
